## Main Manuscript for

# Direct Observation of Stepping Rotation of V-ATPase Reveals Rigid Coupling between $V_0$ and $V_1$ Motors

Akihiro Otomo<sup>a,b</sup>, Tatsuya Iida<sup>a,b</sup>, Yasuko Okuni<sup>a</sup>, Hiroshi Ueno<sup>c</sup>, Takeshi Murata<sup>d</sup>, Ryota Iino<sup>a,b,\*</sup>

<sup>a</sup>Institute for Molecular Science, National Institutes of Natural Sciences, 5-1 Higashiyama, Myodaiji-Cho, Okazaki, Aichi 444-8787, Japan

<sup>b</sup>Department of Functional Molecular Science, School of Physical Sciences, SOKENDAI (Graduate University for Advanced Studies), Shonan Village, Hayama, Kanagawa 240-0193, Japan

<sup>c</sup>Department of Applied Chemistry, Graduate School of Engineering, The University of Tokyo, 7-3-1 Hongo, Bunkyo-Ku, Tokyo 113-8656, Japan

<sup>d</sup>Department of Chemistry, Graduate School of Science, Chiba University, 1-33 Yayoi-Cho, Inage-Ku, Chiba 263-8522, Japan

\*Ryota Iino

**Email:** iino@ims.ac.jp

**Author Contributions:** H.U., T.M. and R.I. conceived original concept; A.O. and R.I. designed research; A.O. performed research and data analysis; A.O., T.I., Y.O., H.U., and T.M. contributed to sample preparation; and A.O. and R.I. wrote the paper.

**Competing Interest Statement:** The authors declare no competing interest.

**Classification:** BIOLOGICAL SCIENCES, Biophysics and Computational Biology

**Keywords:** V-ATPase, Single-molecule analysis, Molecular motors

### This PDF file includes:

Main Text  
Figures 1 to 8  
Tables 1 to 2

## Abstract

V-ATPases are rotary motor proteins which convert chemical energy of ATP into electrochemical potential of ions across the cell membrane. V-ATPases consist of two rotary motors,  $V_o$  and  $V_1$ , and *Enterococcus hirae* V-ATPase (Eh $V_oV_1$ ) actively transports  $\text{Na}^+$  in  $V_o$  (Eh $V_o$ ) by using torque generated by ATP hydrolysis in  $V_1$  (Eh $V_1$ ). Here, we observed ATP-driven stepping rotation of detergent-solubilized Eh $V_oV_1$  wild-type, aE634A, and BR350K mutants under the various  $\text{Na}^+$  and ATP concentrations ( $[\text{Na}^+]$  and  $[\text{ATP}]$ , respectively) by using a 40-nm gold nanoparticle as a low-load probe. When  $[\text{Na}^+]$  was low and  $[\text{ATP}]$  was high, under the condition that only  $\text{Na}^+$  binding to Eh $V_o$  is the rate-limiting, wild-type and aE634A exhibited 10-pausing positions reflecting 10-fold symmetry of the Eh $V_o$  rotor and almost no backward steps. Duration time before forward steps was inversely proportional to  $[\text{Na}^+]$ , confirming that  $\text{Na}^+$  binding triggers the steps. When both  $[\text{ATP}]$  and  $[\text{Na}^+]$  were low, under the condition that both  $\text{Na}^+$  and ATP bindings are rate-limiting, aE634A exhibited 13-pausing positions reflecting 10- and 3-fold symmetries of Eh $V_o$  and Eh $V_1$ , respectively. Distribution of duration time before forward step was well fitted by a sum of two exponential decay functions with distinct time constants. Furthermore, frequent backward steps smaller than  $36^\circ$  were observed. Small backward steps were also observed during long, three ATP cleavage pauses of BR350K. These results indicate that Eh $V_o$  and Eh $V_1$  do not share pausing positions and  $\text{Na}^+$  and ATP bindings occur at different angles, and the coupling between Eh $V_o$  and Eh $V_1$  is not elastic but rigid. **250/250.**

## Significance Statement

V-ATPases are ion pumps consisting of two rotary motor proteins  $V_o$  and  $V_1$ , and actively transport ions across the cell membrane by using chemical energy of ATP. To understand how V-ATPases transduce the energy in the presence of structural symmetry mismatch between  $V_o$  and  $V_1$ , we simultaneously visualized rotational pauses and forward and backward steps of  $V_o$  and  $V_1$  coupled with ion transport and ATP hydrolysis reaction, respectively. Our results indicate rigid coupling of a V-ATPase which has multiple peripheral stalks, in contrast to elastic coupling of F-ATPases with only one peripheral stalk, which work as ATP synthase. Our high-speed/high-precision single-molecule imaging of rotary ATPases in action will pave the way for a comprehensive understanding of their energy transduction mechanisms. **120/120.**

## Main Text

### Introduction

Rotary ATPases are ubiquitously expressed in living organisms and play important roles in biological energy conversions (1-6). These rotary ATPases are classified into F-, V-, and A-ATPases based on their amino acid sequences and physiological functions (6). Eukaryotic and bacterial F-ATPases ( $F_oF_1$ ), and archaeal A-ATPases ( $A_oA_1$ ) mainly function as ATP synthases driven by electrochemical potential of ion across the cell membrane, although they can also act as active ion pumps driven by ATP hydrolysis depending on the cellular environments. On the other hand, V-ATPases ( $V_oV_1$ ) in eukaryotes primarily function as active ion pumps. V-ATPases are also found in bacteria, and some of them are termed as V/A-ATPases based on their physiological function, ATP synthesis (6, 7).

To date, numerous studies have been conducted to understand how the two motor proteins (i.e.,  $F_1/A_1/V_1$  and  $F_o/A_o/V_o$ ) of the rotary ATPases couple their rotational motions and functions. Single-molecule studies using fluorescent probes (8-11), gold nanoparticle (AuNP) or nanorod probes (12-20), and Förster resonance energy transfer (FRET) (15, 21, 22) have revealed rotational dynamics of the rotary ATPases for both ATP hydrolysis/synthesis directions. Furthermore, recent cryo-electron microscopic (cryo-EM) single-particle analyses revealed entire architectures of the rotary ATPases with different structural states at atomic resolutions (23-34). In particular, several studies have demonstrated elastic coupling of  $F_oF_1$  due to large deformations of the peripheral stalk connecting  $F_o$  and  $F_1$  (24, 28, 34). However, few studies on other types of rotary ATPases with

different functions and subunit compositions have been performed, and a comprehensive understanding of the energy transduction mechanism remains elusive.

*Enterococcus hirae* V-ATPase (EhV<sub>0</sub>V<sub>1</sub>) works as an ATP-driven sodium ion (Na<sup>+</sup>) pump to maintain Na<sup>+</sup> concentration ([Na<sup>+</sup>]) inside the cell (Figure 1A) (35-39). Note that we use the term V-ATPase or V<sub>0</sub>V<sub>1</sub> because its physiological function is not ATP synthesis but active ion transport. EhV<sub>0</sub>V<sub>1</sub> is a multi-subunit complex composed of 9 different subunits, namely, ac<sub>10</sub>dE<sub>2</sub>G<sub>2</sub> and A<sub>3</sub>B<sub>3</sub>DF complexes in EhV<sub>0</sub> and EhV<sub>1</sub>, respectively. In EhV<sub>1</sub> A<sub>3</sub>B<sub>3</sub>DF complex, three pairs of the A and B subunits form a hetero-hexameric A<sub>3</sub>B<sub>3</sub> stator ring, and the central rotor DF subcomplex is inserted into the A<sub>3</sub>B<sub>3</sub> ring (Figure 1B, bottom) (40, 41). The EhV<sub>0</sub> ac<sub>10</sub>dE<sub>2</sub>G<sub>2</sub> complex transports Na<sup>+</sup> across the cell membrane. The membrane-embedded rotor ring is formed by a decamer of tetra-helical transmembrane c-subunit (c<sub>10</sub>-ring, Figure 1B, top), connected with the central DF stalk via the d-subunit (25, 42). The stator a-subunit works as an ion channel, and two EG peripheral stalks interact with the a-subunit and A<sub>3</sub>B<sub>3</sub> ring to assure rotary coupling between EhV<sub>0</sub> and EhV<sub>1</sub>. In EhV<sub>1</sub>, the ATP hydrolysis reaction is catalyzed at the interfaces of three A and B subunits. It drives a counterclockwise rotation of the DF rotor subunits as viewed from EhV<sub>0</sub> side (Figure 1B, bottom). Likewise other F<sub>1</sub>/A<sub>1</sub>/V<sub>1</sub> (10, 43), EhV<sub>1</sub> is a stepping motor that rotates 120° per one ATP hydrolysis (44, 45). By using high-speed and high-precision single-molecule imaging analysis with AuNP as a low-load probe, we previously revealed that the 120° step of isolated EhV<sub>1</sub> is further divided into 40 and 80° substeps, which are triggered by ATP binding and ADP release, respectively (44). In contrast, as our previous single-molecule observation of EhV<sub>0</sub>V<sub>1</sub> did not resolve clear pauses and steps (16), elementary steps in the rotation of EhV<sub>0</sub>V<sub>1</sub> have not been revealed.

Although the mechanism of ion transport in the F<sub>0</sub>/A<sub>0</sub>/V<sub>0</sub> has not been fully understood, the so-called “two-channel” model has been widely accepted (46-52). In this model, the a-subunit has two half-channels for ion entry/exit into/from the ion-binding sites of rotor c-ring. In the case of EhV<sub>0</sub>, Na<sup>+</sup> enters the half-channel from the cytoplasmic side and binds to the negatively charged Na<sup>+</sup>-binding sites of the c-subunit (42, 53). Then, the charge-neutralized c-subunit can move into the hydrophobic lipid membrane (51, 54). The rotational torque generated by ATP hydrolysis in EhV<sub>1</sub> is transmitted to EhV<sub>0</sub> via the rotor d-subunit, allowing the c<sub>10</sub>-ring to rotate unidirectionally in the lipid membrane. Na<sup>+</sup> translocated by a nearly single turn of the c<sub>10</sub>-ring reaches another half-channel of the a-subunit, which connects the Na<sup>+</sup>-binding site of c-subunit to the extracellular side. Then, Na<sup>+</sup> is pumped out of the cell by a hydrated microenvironment (55) and/or the electrostatic repulsion with the positively charged residues in the a-subunit, aArg573 and aArg629, located at the interface between two half-channels (Figures 1C and S1) (25). Because EhV<sub>0</sub>V<sub>1</sub> has the c<sub>10</sub>-ring, ten Na<sup>+</sup> are transported per single turn. Therefore, the step size of EhV<sub>0</sub> is expected to be 36° (360°/10), similar to *Escherichia coli* (*E. coli*) and yeast F<sub>0</sub>F<sub>1</sub>, which also have c<sub>10</sub>-rings (12, 13, 21, 34).

The ion-to-ATP ratio is a central issue in the coupling mechanism of rotary ATPases. All known F<sub>1</sub>/A<sub>1</sub>/V<sub>1</sub> has three catalytic sites and 3-fold structural symmetry, and hydrolyzes or synthesizes 3 ATP molecules per single turn. In contrast, the number of protomers forming the rotor c-ring of F<sub>0</sub>/A<sub>0</sub>/V<sub>0</sub> varies from 8 to 17 depending on the species, suggesting wide variations in the ion-to-ATP ratio of rotary ATPases (56, 57). In EhV<sub>0</sub>V<sub>1</sub>, because the rotor c-ring of EhV<sub>0</sub> has a 10-fold structural symmetry (Figure 1B, top), this enzyme has a structural symmetry mismatch and a non-integer ratio between transported Na<sup>+</sup> and hydrolyzed ATP (10/3 = 3.3). If the rotational coupling between EhV<sub>0</sub> and EhV<sub>1</sub> is elastic, as reported for *E. coli* and yeast F<sub>0</sub>F<sub>1</sub>, the symmetry mismatch is relieved by large deformations of the peripheral stalk and/or the central rotor (24, 28, 34, 58). On the other hand, if the coupling is rigid due to multiple peripheral stalks of the EhV<sub>0</sub>V<sub>1</sub>, the pausing positions of both EhV<sub>0</sub> and EhV<sub>1</sub> would be observed independently in a single-molecule observation. To address this issue, it is required to directly visualize the rotational pauses and steps of EhV<sub>0</sub>V<sub>1</sub> under the conditions that elementary steps of rotation for EhV<sub>0</sub> and EhV<sub>1</sub> are both rate-limiting, for example, the bindings of Na<sup>+</sup> and ATP to EhV<sub>0</sub> and EhV<sub>1</sub>, respectively.

Here we carried out high-speed and high-precision single-molecule imaging of rotation of detergent-solubilized EhV<sub>0</sub>V<sub>1</sub> by using 40-nm AuNP as a low-load probe. To resolve the rotational pauses and steps of EhV<sub>0</sub>, a glutamate residue in the stator a-subunit (aGlu634) was replaced with alanine. Since the mutated aGlu634 is located on the surface of Na<sup>+</sup> entry half-channel (Figures

1C and S2), Na<sup>+</sup> binding to the c-subunit in EhV<sub>o</sub>V<sub>1</sub>(aE634A) mutant (hereinafter, referred to as aE634A) is expected to become slower than in wild-type. The rotation rate of aE634A decreased about 10 times compared with that of the wild-type, allowing us to clearly resolve the rotational pauses and steps in EhV<sub>o</sub>. Under the condition that only Na<sup>+</sup> binding is the rate-limiting, aE634A showed 10 pausing positions per single turn and a step size of about 36°, consistent with 10 protomers in the c<sub>10</sub>-ring of EhV<sub>o</sub>. The duration time before the forward step was inversely proportional to the [Na<sup>+</sup>], indicating that the dwell corresponds to the waiting time for Na<sup>+</sup> binding. On the other hand, under the condition that both Na<sup>+</sup> and ATP bindings are the rate-limiting, 13 pausing positions per single turn were observed. Furthermore, backward steps smaller than 36° were frequently observed only when ATP binding is also the rate-limiting, indicating that EhV<sub>o</sub>V<sub>1</sub> undergoes Brownian motion between adjacent pausing positions of EhV<sub>o</sub> and EhV<sub>1</sub> when no torque is applied from EhV<sub>1</sub>. The backward steps of 36° or larger than 36° were rarely observed, suggesting the suppression of the reverse Na<sup>+</sup> transport. Small backward steps were also frequently observed during long, three ATP cleavage pauses of another mutant EhV<sub>o</sub>V<sub>1</sub>(BR350K) in which ATP hydrolysis is the rate-limiting of rotation (44). From these results, we conclude that EhV<sub>o</sub> and EhV<sub>1</sub> do not share their pausing positions and Na<sup>+</sup> and ATP bindings occur at different angles, and their coupling is not elastic but rigid.

## Results

### *Single-molecule imaging system and generation of EhV<sub>o</sub>V<sub>1</sub> aE634A mutant*

For the single-molecule observation, a poly-histidine tag (His<sub>3</sub>-tag) was introduced to the C-terminus of c-subunit to immobilize the detergent-solubilized EhV<sub>o</sub>V<sub>1</sub> complex on a Ni<sup>2+</sup>-NTA coated glass surface (Figure 2A). Furthermore, the N-terminus of A-subunit was biotinylated by a genetically fused Avi-tag (59), and streptavidin-coated AuNP probe ( $\phi=40$  nm) was attached (Figure 2A). Note that the stator subunits rotate against the rotor subunits by ATP hydrolysis in our experimental system because the rotor c<sub>10</sub>-ring was fixed on the glass surface. The ATP-driven rotation was observed under the total internal reflection dark-field microscope at 1,000 or 3,000 frames per second (fps) at 25°C. In this system, the localization precision was 0.6 nm at 3,000 fps (0.33 ms temporal resolution), determined by centroid analysis of the scattering images of single AuNPs non-specifically attached to the glass surface (Figure S3).

To clearly visualize the ATP-driven rotation rate-limited by Na<sup>+</sup> transport, site-directed mutagenesis was conducted on the a-subunit of EhV<sub>o</sub>. In the a-subunit of V<sub>o</sub>, there are some negatively charged amino acid residues on the surface of half-channels forming ion transport pathways (23, 60). In EhV<sub>o</sub>, aGlu634 is located on the Na<sup>+</sup> entry half-channel (Figure 1C). This glutamate residue is completely conserved among other V<sub>o</sub>V<sub>1</sub> (Figure S1), suggesting that this negatively charged residue has a role in attracting ions into the entry half-channel. To reduce the Na<sup>+</sup> binding rate, we prepared EhV<sub>o</sub>V<sub>1</sub> mutant, aE634A, where aGlu634 was replaced with alanine to eliminate the negative charge of the side chain. The purified aE634A solubilized with *n*-dodecyl- $\beta$ -D-maltoside (DDM) exhibited the subunit stoichiometry similar to the wild-type in SDS-PAGE (Figure S4), indicating intactness of the complex.

### *[ATP] and [Na<sup>+</sup>] dependence of rotation rate of wild-type and aE634A*

Rotation rates of wild-type and aE634A at various substrate concentrations were examined from the slope of the time course of rotation (Figures 2B, C, and S5). [ATP] dependences of the rotation rate for wild-type and aE634A in the presence of 300 mM Na<sup>+</sup> are shown in Figure 2B. Under this high [Na<sup>+</sup>] condition, Na<sup>+</sup> binding is fast and not rate-limiting, and consequently, [ATP] dependence obeyed Michaelis-Menten kinetics. Obtained kinetic parameters, the Michaelis constant ( $K_m^{\text{ATP}}$ ) and the maximum velocity ( $V_{\text{max}}^{\text{ATP}}$ ), are summarized in Table 1. The value of  $K_m^{\text{ATP}}$  for wild-type was  $60.4 \pm 2.1$   $\mu\text{M}$  (fitted value  $\pm$  S.E. of the fit). This value was comparable to that for isolated EhV<sub>1</sub> ( $43 \pm 6$   $\mu\text{M}$ ), indicating that apparent affinity of ATP was not significantly affected by EhV<sub>o</sub>. On the other hand, the value of  $V_{\text{max}}^{\text{ATP}}$  ( $40.0 \pm 0.3$  rps, fitted value  $\pm$  S.E. of the fit) was significantly smaller than that of the isolated EhV<sub>1</sub> ( $117 \pm 3$  rps) (44). As a result, the binding rate constant of ATP ( $k_{\text{on}}^{\text{ATP}}$ ) estimated by  $3 \times V_{\text{max}}^{\text{ATP}} / K_m^{\text{ATP}}$  was smaller than that of the isolated

EhV<sub>1</sub> (Table 1). We attributed this difference to the intact interaction between rotor c<sub>10</sub>-ring and stator a-subunit of EhV<sub>o</sub> and concluded that Na<sup>+</sup> transport in EhV<sub>o</sub> limits the  $V_{\max}^{\text{ATP}}$  of EhV<sub>o</sub>V<sub>1</sub>, as discussed in our previous single-molecule study (16). In aE634A, the values of  $K_m^{\text{ATP}}$  and  $V_{\max}^{\text{ATP}}$  were  $6.6 \pm 0.3 \mu\text{M}$  and  $4.58 \pm 0.04 \text{ rps}$ , respectively, and both were approximately one-tenth of those for wild-type (Table 1). Thus, the  $k_{\text{on}}^{\text{ATP}}$  for aE634A ( $2.1 \times 10^6 \text{ M}^{-1}\text{s}^{-1}$ ) was in close agreement with that for wild-type ( $2.0 \times 10^6 \text{ M}^{-1}\text{s}^{-1}$ ) (Table 1). These results indicate that the mutation in aGlu634 affects only Na<sup>+</sup> transport but not ATP binding in the EhV<sub>o</sub>V<sub>1</sub> complex.

Figure 2C shows [Na<sup>+</sup>] dependence of the rotation rate at the saturated [ATP] (5 mM). Here, contaminated Na<sup>+</sup> in the observation buffers were estimated by an inductivity coupled plasma optical emission spectrometer (ICP-OES) (Figure S6), and total [Na<sup>+</sup>] including contamination was used for the plot. Under this condition, [ATP] is sufficiently high and ATP binding is not rate-limiting (Figure 2B and Table 1), and the effect of [Na<sup>+</sup>] on the rotation rate becomes obvious. As a result, both wild-type and aE634A showed biphasic responses to [Na<sup>+</sup>]. As reported in our previous studies, data were fitted by a summation of two independent Michaelis-Menten equations assuming two Na<sup>+</sup> binding sites (16, 61). The obtained kinetic parameters are shown in Table 2. The both values of  $V_{\max 1}^{\text{Na}}$  and  $V_{\max 2}^{\text{Na}}$  for aE634A ( $1.1 \pm 0.3$  and  $4.4 \pm 0.5 \text{ rps}$ , fitted value  $\pm$  S.E. of the fit) were about ten times smaller than those for wild-type ( $15.7 \pm 1.6$  and  $35.0 \pm 7.1 \text{ rps}$ ) (Table 2). On the other hand, considering the large fitting error especially in wild-type, the values of  $K_{m 1}^{\text{Na}}$  and  $K_{m 2}^{\text{Na}}$  do not seem to be significantly different between aE634A ( $0.32 \pm 0.28$  and  $58.3 \pm 26.5 \text{ mM}$ , fitted value  $\pm$  S.E. of the fit) and wild-type ( $0.29 \pm 0.09$  and  $160.2 \pm 88.8 \text{ mM}$ ). Then, the binding rate constant of Na<sup>+</sup> ( $k_{\text{on}}^{\text{Na}}$ ) estimated by  $10 \times V_{\max}^{\text{Na}} / K_m^{\text{Na}}$  largely decreased in aE634A, especially more than ten times for the high-affinity site ( $k_{\text{on} 1}^{\text{Na}}$ , Table 2). The significant decrease in the  $V_{\max 2}^{\text{Na}}$  for aE634A compared with that of wild-type also suggests that the rate of elementary reaction steps other than Na<sup>+</sup> binding also decreased in EhV<sub>o</sub>. Because Na<sup>+</sup> binding to EhV<sub>o</sub> is certainly the rate-limiting at low [Na<sup>+</sup>] for both wild-type and aE634A, we then conducted a detailed analysis of the rotational pauses and steps at low [Na<sup>+</sup>].

#### *Pauses and steps of EhV<sub>o</sub> and EhV<sub>1</sub> in ATP-driven rotation of wild-type and aE634A*

Figures 3A and S7 show typical time courses of rotational trajectory (pink line) of wild-type observed at 0.3 mM Na<sup>+</sup> and 5 mM ATP with 3,000 fps (0.33 ms temporal resolution). Enlarged trajectory for single revolution and corresponding x-y trajectory (inset, pink line) are also shown. Under this condition, not ATP binding but Na<sup>+</sup> binding is the rate-limiting of ATP-driven rotation (Figures 2B and C, Table 2). The rotational trajectory showed transient pauses and steps in a forward, counterclockwise direction. Then, the pauses and steps were objectively detected with a step-finding algorithm (62) (black line on the trajectory) applied to median-filtered traces (current  $\pm$  4 frames, red line), as our previous studies on other motor proteins (63, 64). As indicated by the numbers in the trajectories, 10 pauses were mainly detected in a single turn (Figure S8A), reflecting the number of protomers in rotor c<sub>10</sub>-ring (Figure 1B, top). In addition, number of pauses smaller or larger than 10 per single turn was also detected (Figure S8A). The number of pauses smaller than 10 can be attributed to undetectable short pauses due to the limited time resolution, because stepping behavior is a stochastic process. The number of pauses larger than 10 is presumably attributed to occasional detection of the sub-pauses of EhV<sub>1</sub> for ADP release, which has a time constant of 2.5 ms and is independent of [ATP] (44). Furthermore, small fraction of under- or over-fitting of the step-finding algorithm would also be included (64). Distribution of the step size revealed that backward steps were rarely observed (0.8%, Figure 3B), the average value of forward step was  $36.6^\circ$ , and a Gaussian function well fitted the distribution with the peak at  $33.8 \pm 14.2^\circ$  (peak  $\pm$  S.D.). These values show excellent agreement with the step size expected from the structural symmetry of c<sub>10</sub>-ring ( $360^\circ/10=36^\circ$ ). Distribution of the duration time before forward step was well fitted by a single exponential decay function with the time constant of  $13.5 \pm 0.3 \text{ ms}$  (fitted value  $\pm$  S.E. of the fit), indicating single rate-limiting step of the rotation (Figure 3C).

Rotational trajectories of aE634A observed at 0.3 mM Na<sup>+</sup> and 5 mM ATP with 1,000 fps are shown in Figures 4A and S9. In aE634A, the median filtering of current  $\pm$  7 frames was applied for the step-finding algorithm (62). As in wild-type, the number of pauses per single turn was mainly 10 (Figure S8B), and the step size was  $37.1^\circ$  (average) or  $34.9 \pm 12.8^\circ$  (peak  $\pm$  S.D.) (Figure 4B),



consistent with the structural symmetry of  $c_{10}$ -ring, and the ratio of backward step was minor (1.2%). Distribution of the duration time before forward steps for aE634A was well fitted by a single exponential decay function with the time constant of  $137 \pm 6$  ms (Figure 4C) which is 10 times larger than that for wild-type, consistent with the analysis of rotation rate (Figure 2C and Table 2). For aE634A, we also examined  $[\text{Na}^+]$  dependence, and Figure S10 shows rotational trajectories at 0.09 or 1.3 mM  $\text{Na}^+$  and 5 mM ATP. Distributions of the step size and the duration time before forward step at 0.09 and 1.3 mM  $\text{Na}^+$  are shown in Figure 5A-D, respectively. As same at 0.3 mM  $\text{Na}^+$ , the step sizes of about  $36^\circ$  were obtained, indicating that  $36^\circ$  step is independent of  $[\text{Na}^+]$ . In contrast, although distributions of the duration time before forward step were also well fitted by single exponential decay functions as 0.3 mM  $\text{Na}^+$ , the time constants changed largely. Figure 5E shows  $[\text{Na}^+]$  dependence of the time constant. The slope was -1.1, in the case that the data point at 1.3 mM  $\text{Na}^+$  was excluded because it is the first saturating concentration observed in the rotation rate analysis (Figure 2C and Table 2). If this data point was included, the slope was -1.0. Therefore, the time constant is almost inversely proportional to  $[\text{Na}^+]$ , indicating that  $\text{Na}^+$  binding is the rate-limiting of rotation. Furthermore, this result indicates that ATP hydrolysis in  $\text{EhV}_1$  is tightly coupled with  $\text{Na}^+$  transport in  $\text{EhV}_o$  in the  $\text{EhV}_o\text{V}_1$  complex solubilized with DDM.

Next, we observed rotation of aE634A at 0.3 mM  $\text{Na}^+$  and 1  $\mu\text{M}$  ATP with 1,000 fps (Figures 6 and S11). Under this condition, both  $\text{Na}^+$  and ATP bindings are the rate-limiting of rotation (Figures 2B and C). The step-finding algorithm was applied to the median-filtered trace (current  $\pm 7$  frames, red line). As a result, the number of detected pauses in a single turn was mainly 13, reflecting 10-pausing positions of  $\text{EhV}_o$  and 3-pausing positions of  $\text{EhV}_1$  (Figure S8C). This result indicates that the pausing positions waiting for  $\text{Na}^+$  and ATP bindings are different in  $\text{EhV}_o\text{V}_1$  complex. Distribution of the step size is shown in Figure 6B. The average value for forward step was  $29.9^\circ$  and distinctly smaller than  $36^\circ$ . When we superimposed two histograms of Figure 4B (0.3 mM  $\text{Na}^+$  and 5 mM ATP) and Figure 6B (0.3 mM  $\text{Na}^+$  and 1  $\mu\text{M}$  ATP) after normalizing the maximum values, difference was obvious (Figure S12). Furthermore, interestingly, in contrast to the condition that  $\text{Na}^+$  binding was the sole rate-limiting factor, the ratio of backward step increased to 6.1%. Therefore, we fitted the distribution with the sum of three Gaussians: one peak in backward (minus) direction and two peaks in forward (plus) direction. Note that one of the forward peaks was fixed at  $36^\circ$ , assuming as the step of  $\text{EhV}_o$ . Then, we obtained three peaks at  $-14.2 \pm 6.8$ ,  $23.1 \pm 10.4$ , and  $36.0 \pm 12.8^\circ$  (peak  $\pm$  S.D., Figure 6B). For comparison, the fitting with two Gaussians with peaks at minus and plus directions is shown in Figure S13A. Distribution of the duration time before forward step was better fitted with a sum of two exponential decay functions (coefficient of determination  $R^2 = 0.98$ , Figure 6C) than with a single exponential decay function ( $R^2 = 0.94$ , Figure S13B), and time constants of  $135 \pm 24$  and  $642 \pm 322$  ms (fitted value  $\pm$  S.E. of the fit) were obtained. These values presumably correspond to the time constants for  $\text{Na}^+$  and ATP bindings, respectively, because the time constant for  $\text{Na}^+$  binding was 137 ms at 0.3 mM  $\text{Na}^+$  and 5 mM ATP (Figure 4C), and that for ATP binding was 476 ms at 1  $\mu\text{M}$  ATP estimated from  $k_{\text{on}}^{\text{ATP}}$  ( $2.1 \times 10^6 \text{ M}^{-1}\text{s}^{-1}$ , Table 1). These results are consistent with the notion that both  $\text{Na}^+$  and ATP bindings are the rate-limiting of rotation.

#### *Backward and recovery steps between adjacent pauses of $\text{EhV}_o$ and $\text{EhV}_1$*

As described above, frequent backward steps (6.1% of total steps) were observed under the condition that both  $\text{Na}^+$  and ATP bindings are the rate-limiting of rotation (Figure 6B). Typical examples of the backward step are shown in Figure 7. Green, cyan, and purple lines indicate forward step just before the backward step, backward step, and forward step after the backward step (recovery step), respectively. Figures 7B-D show the step size distributions for these events. The average value of backward step size was  $-18.8^\circ$  (Figure 7C), which is smaller than the expected step size ( $36^\circ$ ) of  $\text{EhV}_o$ . Because backward steps were frequently observed when not only  $\text{Na}^+$  binding but also ATP binding was the rate-limiting of rotation, it is reasonable to assume that backward steps occur during the pauses waiting for ATP binding. The backward step size smaller than  $36^\circ$  is also consistent with the notion that the pausing positions waiting for  $\text{Na}^+$  and ATP bindings are different in  $\text{EhV}_o\text{V}_1$  complex, and backward steps occur at the intermediate pausing position of  $\text{EhV}_1$  between pausing positions of  $\text{EhV}_o$ . The forward steps just before the

backward and recovery steps seemed to show two kinds of step sizes, smaller than  $36^\circ$  and close to  $36^\circ$  (Figures 7B and D). The backward and forward steps smaller than  $36^\circ$  suggest the Brownian motion between the adjacent pausing positions waiting for ATP and  $\text{Na}^+$  bindings. Furthermore,  $36^\circ$  forward steps just before the backward steps suggest a standard forward step in  $\text{EhV}_0$  followed by the Brownian backward step to the adjacent pausing position of the  $\text{EhV}_1$ , and  $36^\circ$  recovery steps after the backward steps suggest a resumption of the rotation after ATP binding to  $\text{EhV}_1$ .

Then, to test the hypothesis whether the backward steps occur equally at three pausing positions of  $\text{EhV}_1$ , we prepared other mutants, isolated  $\text{EhV}_1(\text{BR350K})$  and  $\text{EhV}_0\text{V}_1(\text{BR350K})$  complex. Because an arginine residue in the B-subunit (BArg350) of  $\text{EhV}_1$  plays a crucial role in ATP hydrolysis (Figure S14) (40), the rotation rate of  $\text{EhV}_1(\text{BR350K})$  mutant decreases about 100 times than that of wild-type  $\text{EhV}_1$  (44). This property makes ATP cleavage pauses of  $\text{EhV}_1$  much longer in  $\text{EhV}_0\text{V}_1(\text{BR350K})$  even at high  $[\text{ATP}]$ , and the pauses of  $\text{EhV}_0$  and  $\text{EhV}_1$  become distinguishable. The rotations of  $\text{EhV}_1(\text{BR350K})$  and  $\text{EhV}_0\text{V}_1(\text{BR350K})$  observed at 0.3 mM  $\text{Na}^+$  and 5 mM ATP with 1,000 fps are shown in Figure S15. Note that in the isolated  $\text{EhV}_1(\text{BR350K})$ , His<sub>6</sub>-tag was introduced to the N-terminus of the A-subunit to immobilize the stator A<sub>3</sub>B<sub>3</sub> ring, and 40-nm AuNP probe was attached to the rotor D-subunit (Figure S14). Three long pauses were observed in both mutants, attributed to ATP cleavage pauses. Similar to our previous study,  $\text{EhV}_1(\text{BR350K})$  did not show clear backward steps during long ATP cleavage pauses under this condition (Figure S15A) (44). On the other hand,  $\text{EhV}_0\text{V}_1(\text{BR350K})$  exhibited frequent backward and recovery steps during long ATP cleavage pauses (Figure S15B). Distribution of the step size showed two peaks at  $-11^\circ$  and  $11^\circ$  and the sizes were smaller than  $36^\circ$  (Figure S15C), and these small backward and recovery steps occurred equally in all three ATP cleavage pauses of  $\text{EhV}_1$ .

## Discussion

### *ATP-driven rotation of $\text{EhV}_0\text{V}_1$ tightly coupled with $[\text{Na}^+]$*

In the present study, we directly visualized ATP-driven rotation of  $\text{EhV}_0\text{V}_1$  rate-limited by ion transport.  $\text{EhV}_0\text{V}_1$  used in this study transports  $\text{Na}^+$ , while most of the rotary ATPases transport  $\text{H}^+$ . This property of  $\text{EhV}_0\text{V}_1$  has advantages to resolve the stepping rotation rate-limited by ion transport in  $\text{V}_0$ . Firstly,  $\text{H}^+$  transport in rotary ATPases is thought to be achieved by a Grotthuss mechanism (14, 65), in which  $\text{H}^+$  transfer is not a rate-limiting process. Indeed, the duration time of transient dwells of  $\text{F}_0$  in *E. coli*  $\text{F}_0\text{F}_1$  did not exhibit pH dependence ranging from pH 5 to 9, although the frequency of pause occurrence was highly affected by pH (14). In addition, changes in pH can largely affect protein stabilities and enzymatic reactions, whereas changes in  $[\text{Na}^+]$  would mildly affect them. Here, we resolved the pauses and steps of  $\text{EhV}_0\text{V}_1$  by using a mutant in which aGlu634 residue in the stator a-subunit of  $\text{EhV}_0$  was substituted with alanine (aE634A) and found that the duration time before forward steps is inversely proportional to  $[\text{Na}^+]$  (Figure 5E). We have previously confirmed that the coupling in  $\text{EhV}_0\text{V}_1$  is retained by using DCCD (*N,N'*-dicyclohexylcarbodiimide) modification assay (16).  $[\text{Na}^+]$  dependences of the rotation rate in both wild-type and aE634A (Figure 2C) are also strong evidence for the intact coupling. To the best of our knowledge, the present study first demonstrated ATP-driven rotation of a rotary ATPase rate-limited by the ion transport and tight coupling between ion binding and rotational step, although single-molecule studies of ATP-driven rotation of  $\text{H}^+$ -transporting rotary ATPases have been reported (12-14, 66-69).

We found that both wild-type and aE634A mainly shows 10 pauses per single turn and  $36^\circ$  steps (Figures 3 and 4), which reflect the structural symmetry of  $\text{c}_{10}$ -ring under the condition that only  $\text{Na}^+$ -binding is the rate-limiting of rotation (0.3 mM  $\text{Na}^+$  and 5 mM ATP). In addition, number of pauses larger or smaller than 10 per single turn was also observed (Figure S8). From the time constants for elementary steps of ATP hydrolysis reaction in  $\text{EhV}_1$  and the time resolution of measurement (0.33 and 1 ms for wild-type and aE634A, respectively), we can consider the case where more than 10 pauses are detected (Figure S8). From the  $k_{\text{on}}^{\text{ATP}}$  of wild-type and aE634A ( $2.0 \times 10^6$  and  $2.1 \times 10^6 \text{ M}^{-1}\text{s}^{-1}$ , respectively, Table 1), the time constants for ATP binding are estimated to be about 0.1 ms at 5 mM ATP. In addition, by using the isolated  $\text{EhV}_1$ , we previously reported that the time constants for ATP cleavage and phosphate release are smaller than 1 ms,

and that for ADP release is 2.5 ms. Furthermore, ADP release occurs at different angle from that of ATP binding, while ATP cleavage and phosphate release occur at same angle to ATP binding (44). Considering stochastic nature of pause duration and current time resolution, these elementary events, especially ADP release, can be also detected. If the time resolution and the localization precision is further improved, detection of 16 pauses (10, 3, and 3 pauses for Na<sup>+</sup> binding, ATP binding, and ADP release, respectively) would become possible, and give us further insight into the energy transduction mechanism of EhV<sub>o</sub>V<sub>1</sub> complex. Similarly, number of pauses less than 10 can also occur stochastically due to Na<sup>+</sup> binding events with shorter dwell time than the time resolution. Another possible explanation is stochastic H<sup>+</sup> transport instead of Na<sup>+</sup> in EhV<sub>o</sub>V<sub>1</sub> at low [Na<sup>+</sup>]. It has been reported that H<sup>+</sup> can bind to the ion-binding site of EhV<sub>o</sub> c-subunit when [Na<sup>+</sup>] is sufficiently low (42). Because H<sup>+</sup> binding will not be the rate-limiting factor as described above, the pauses could not be detected at the current time resolution (13). In the present study, we could not distinguish Na<sup>+</sup> and H<sup>+</sup> bindings, and assumed that steps are triggered by Na<sup>+</sup> bindings. Whether or not EhV<sub>o</sub>V<sub>1</sub> really transports H<sup>+</sup> under the low [Na<sup>+</sup>] conditions will be discussed elsewhere. Furthermore, we need to mention that the step-finding algorithm we used cannot perfectly eliminate the over- and under-fittings (62, 64).

The  $V_{\max}^{\text{ATP}}$  of wild-type EhV<sub>o</sub>V<sub>1</sub> ( $40.0 \pm 0.3$  rps) at 300 mM Na<sup>+</sup> was smaller than that of isolated EhV<sub>1</sub> ( $117 \pm 3$  rps) (Figure 2B and Table 1) (44). The difference is presumably caused by elementary steps of Na<sup>+</sup> transport in EhV<sub>o</sub>, especially by Na<sup>+</sup> release, and/or the interaction (molecular friction) between rotor c<sub>10</sub>-ring and stator a-subunit. If we assume that Na<sup>+</sup> release is the rate-limiting, we can estimate the time constant for Na<sup>+</sup> release to be 1.6 ms from the difference of the  $V_{\max}^{\text{ATP}}$  between EhV<sub>o</sub>V<sub>1</sub> and EhV<sub>1</sub>. Note that in the present study, both entry and exit half-channels of the a-subunit were exposed to the solution with 300 mM Na<sup>+</sup> because we used detergent-solubilized EhV<sub>o</sub>V<sub>1</sub>. Effect of Na<sup>+</sup> rebinding from the exit half-channel on the rotation rate of EhV<sub>o</sub>V<sub>1</sub> is an interesting question that needs to be clarified in future. On the other hand, the  $V_{\max}^{\text{ATP}}$  of aE634A ( $4.58 \pm 0.04$  rps) at 300 mM Na<sup>+</sup> was approximately one-tenth that of wild-type ( $40.0 \pm 0.3$  rps) (Figure 2B and Table 1). Michaelis-Menten kinetics analysis showed that the  $k_{\text{on}}^{\text{ATP}}$  of aE634A was similar to that of wild-type, although the  $k_{\text{on}}^{\text{Na}}$  of aE634A significantly decreased compared with that of wild-type (Tables 1 and 2). These results indicate that aE634A mutation has little effect on ATP binding to EhV<sub>1</sub>. The mutated glutamate residue is located on the surface of entry half-channel of a-subunit (Figure 1C), and the decrease in  $k_{\text{on}}^{\text{Na}}$  is likely caused by the loss of negative charge. Interestingly, this glutamate residue is completely conserved among Na<sup>+</sup>- and H<sup>+</sup>-transporting V-ATPases (Figures S1 and S2) (23, 25, 60, 70). Therefore, it may have a common role in efficient ion uptake for both Na<sup>+</sup> and H<sup>+</sup>. Consistent with this notion, ion selectivity seems to be determined by the ion-binding site of c-ring rather than the half-channels in a-subunit (71, 72).

The rotation rate of both wild-type and aE634A showed a biphasic response to [Na<sup>+</sup>] (Figure 2C and Table 2). This biphasic response was also reported previously on the ATPase activity of detergent-solubilized EhV<sub>o</sub>V<sub>1</sub> (16, 61). The Michaelis-Menten parameters obtained in this study are slightly different from those in previous studies, presumably due to differences in experimental conditions, especially pH and [Na<sup>+</sup>] contaminated in the observation buffer. Regarding the Na<sup>+</sup> contamination in the experimental system, it should be noted that it is difficult to discuss the affinity at the sub-micromolar range since the observation buffer contains at least 90 μM of Na<sup>+</sup> (Figure S6). The biphasic response to [Na<sup>+</sup>] strongly suggests two different Na<sup>+</sup>-binding sites of EhV<sub>o</sub>V<sub>1</sub> with largely different affinities. One possible explanation is that these sites are related to the entry and exit half-channels of a-subunit. The high-affinity binding site may correspond to the Na<sup>+</sup> binding to the c-ring from the entry site because the dissociation constant of Na<sup>+</sup> to c-subunit in EhV<sub>o</sub>V<sub>1</sub> complex was reported as 12 μM in the absence of ATP (42). On the other hand, the low-affinity Na<sup>+</sup> binding site corresponding to  $K_{m2}^{\text{Na}}$  has not been identified yet. We assume that the low-affinity site would be physiologically important because an intracellular [Na<sup>+</sup>] in *Enterococcus hirae* has been reported to be several tens of millimolar (36, 39, 73). To clarify the mechanism of the biphasic response of EhV<sub>o</sub>V<sub>1</sub> to [Na<sup>+</sup>], it will be required to embed EhV<sub>o</sub>V<sub>1</sub> in the lipid membrane and change the [Na<sup>+</sup>] in the entry and exit sides independently (74). Alternatively, mutagenesis in the Na<sup>+</sup> exit half-channel of a-subunit will provide new insights into the biphasic response. Recently, Yanagisawa et al. investigated *E. coli* F<sub>o</sub>F<sub>1</sub> mutants by replacing charged or polar residues in entry



and exit half-channels with non-polar leucine residues and successfully revealed that these residues possess optimal  $pK_a$  values for unidirectional  $H^+$  transfer (14). A similar approach would be also helpful for  $EhV_oV_1$ .

#### *Rigid coupling between $EhV_o$ and $EhV_1$ in the $EhV_oV_1$ complex*

By using single-molecule imaging of aE634A under the condition that both  $Na^+$  and ATP bindings are the rate-limiting of rotation, we visualized the pauses of  $EhV_o$  and  $EhV_1$  simultaneously (Figure 6A and S11). We found that aE634A mainly shows 13 pauses per single turn under this condition (Figure S8C). Furthermore, frequent backward and recovery steps smaller than  $36^\circ$  were observed (Figure 7), not only in aE634A but also during three long ATP cleavage pauses of  $EhV_oV_1$ (BR350K) (Figure S15). These results indicate that pausing positions waiting for  $Na^+$  and ATP bindings are different, and transitions occur between adjacent pausing positions of  $EhV_o$  and  $EhV_1$ . These results also indicate that ATP hydrolysis reaction in  $EhV_1$  is tightly coupled with  $Na^+$  transport in  $EhV_o$ , and this coupling is not elastic but rigid. Considering our observation system where the stator  $aA_3B_3E_2G_2$  complex rotates against the rotor  $dc_{10}DF$  complex immobilized on the glass surface, if the complex shows a fully elastic coupling, the pausing positions of  $EhV_o$  and  $EhV_1$  would be superimposed by deformation of the peripheral  $E_2G_2$  stalks or the central DF shaft. In this case, single turn ( $360^\circ$  revolution) would be divided into two  $108^\circ$  ( $36^\circ \times 3$ ) and one  $144^\circ$  ( $36^\circ \times 4$ ) with extensive deformation. However, our results clearly showed 10 pauses per single turn ( $36^\circ$  step) at high [ATP] and 13 pauses at low [ATP], indicating the rigid coupling in which  $120^\circ$  steps in  $EhV_1$  are retained in the presence of structural symmetry mismatch between  $EhV_o$  and  $EhV_1$ .

The different pausing positions between  $V_o$  and  $V_1$  have also been reported by a single-molecule study of detergent-solubilized  $H^+$ -transporting *Thermus thermophilus*  $V/A$ -ATPase (here termed as  $TtV_oV_1$ ), which acts as ATP synthase (19). During rotation in the ATP-hydrolysis direction,  $TtV_oV_1$  showed  $30^\circ$  steps derived from  $c_{12}$ -ring of  $TtV_o$  and extra pauses between two adjacent pauses of  $TtV_o$ . These extra pauses were attributed to catalytic dwells of  $TtV_1$ . Furthermore, corresponding structures were also recently revealed by cryo-EM study of nanodisc-embedded  $TtV_oV_1$  (23). Zhou et al. resolved structures of two substates in addition to three main states, which reflect three-fold structural symmetry of  $TtV_1$ . Those substates, 1L and 1R, which differ in the relative position of  $TtV_o$  and  $TtV_1$ , exhibited slight twist of central shaft and deformation of peripheral stalks against state 1. Although it remains uncertain which pauses found in the single-molecule study correspond to those substates, it is intriguing that the angles of  $TtV_o$  and  $TtV_1$  do not coincide despite that  $TtV_o$  has  $c_{12}$ -ring and no symmetry mismatch with  $TtV_1$ .

The rigid coupling between  $EhV_o$  and  $EhV_1$  is distinct from *E. coli*, *Bacillus* PS3, and yeast mitochondrial F-ATPases, in which cryo-EM studies have proposed the elastic coupling (24, 28, 34). These F-ATPases have  $c_{10}$ -rings (33, 75) and same structural symmetry mismatches as  $EhV_oV_1$ . Structural analysis of *E. coli* or *Bacillus* PS3  $F_oF_1$  revealed that three rotational steps were classified into two  $108^\circ$  steps and one  $144^\circ$  step. This significant mismatch was tolerated by the flexible peripheral stalk rather than the central shaft (24, 28, 76). Actually, very recent cryo-EM study of yeast mitochondrial  $F_oF_1$  revealed extensive deformation of the peripheral stalk during catalysis (34). In rotary ATPases, number of the peripheral stalks varies from one to three, depending on enzymes (6, 77, 78). *E. coli*, *Bacillus* PS3 and yeast  $F_oF_1$  possess only one peripheral stalk (24, 28), whereas  $EhV_oV_1$  has two peripheral stalks which can strongly connect two motor domains (Figure 1A) (25). As a result,  $EhV_oV_1$  would rotate rigidly without large and elastic deformations. Consistent with this notion, a cryo-EM study of yeast  $V_oV_1$  which has three peripheral stalks showed almost uniform three  $120^\circ$  steps despite having a  $c_{10}$ -ring (26).

In addition to the number of peripheral stalks, the number of c-subunits in a rotor ring also varies widely from 8 to 17 among the species (56, 57). This makes the issue more complicated, because different number of c-subunits will change the step size and the ion-to-ATP ratio. Furthermore, number of transmembrane helices in a c-subunit monomer also differs among species. For example, although both  $EhV_oV_1$  and *E. coli*  $F_oF_1$  have  $c_{10}$ -ring, each c-subunit consists of tetra- and double-transmembrane helices, respectively (24, 53). This results in largely different diameters of  $c_{10}$ -ring, 8 and 5 nm for  $EhV_oV_1$  and *E. coli*  $F_oF_1$ , respectively (25). Obviously, larger rings would require larger deformations to adjust relative angles between  $V_o/F_o$  and  $V_1/F_1$  if the

elastic coupling is assumed. Another interesting feature of EhV<sub>o</sub>V<sub>1</sub> with large c-ring is “off-axis” rotation which may affect the coupling between EhV<sub>o</sub> and EhV<sub>1</sub> (25). However, the off-axis rotation was not resolved in the present single-molecule experiments. To understand the common and diverse mechanisms of energy transduction in the rotary ATPases, a comprehensive study of various ATPases with rotor c-rings of different c-subunit numbers and sizes will be required.

#### *Brownian ratchet rotation of EhV<sub>o</sub>*

Figure 8 shows the schematic model of the stepping rotation of EhV<sub>o</sub>V<sub>1</sub> at high [ATP] and low [Na<sup>+</sup>] (Figure 8A), and at low [ATP] and low [Na<sup>+</sup>] (Figure 8B). In the present study, backward steps were rarely observed when [ATP] is high (5 mM) in both wild-type and aE634A (Figures 3B, 4B, 5A, and 5B). In EhV<sub>o</sub>V<sub>1</sub>, the torque for ATP-driven rotation is generated by ATP binding and ADP release in EhV<sub>1</sub> (44), and the value has been estimated to be 20 pNm (16). When [ATP] is high, time constants for ATP binding and ADP release are both small, and the torque from EhV<sub>1</sub> will be applied to EhV<sub>o</sub> almost constantly. Therefore, EhV<sub>o</sub>V<sub>1</sub> will show unidirectional rotation without backward steps (Figure 8A). On the other hand, when [ATP] is low (1 μM), where the time constant for ATP binding is large (476 or 642 ms, Table 1 and Figure 6C), frequent backward steps were observed (Figure 7A). The size of the backward steps was much smaller than 36° (14.2 or 18.8°, Figures 6B and 7C). Because no torque is applied when EhV<sub>o</sub>V<sub>1</sub> is waiting for ATP binding at the pausing position of EhV<sub>1</sub> (Figure 8B, dark green), it can move to the adjacent backward (and also forward) pausing position of EhV<sub>o</sub> by the Brownian motion (Figure 8B, blue arrows). Backward and recovery steps smaller than 36° were more frequently observed in EhV<sub>o</sub>V<sub>1</sub>(BR350K), in which ATP cleavage pauses are prominently longer than wild-type (Figure S15). Importantly, backward steps occurred equally during three ATP cleavage pauses of EhV<sub>1</sub>, consistent with the notion that backward steps are driven by thermal fluctuation, not by elastic strain accumulation. These results support Brownian ratchet model of EhV<sub>o</sub> rotation in addition to the rigid coupling of EhV<sub>o</sub>V<sub>1</sub>. Note that the size of backward steps occurring at three pausing positions of EhV<sub>1</sub> will not be uniform in the model shown in Figure 8B. However, it was difficult for us to resolve the difference under the current experimental set up.

In our previous study of the isolated EhV<sub>1</sub>, no backward steps are observed in ATP-driven rotation except under extreme experimental conditions (44). Therefore, backward and forward steps smaller than 36° observed in EhV<sub>o</sub>V<sub>1</sub> are caused by EhV<sub>o</sub>, and are presumably coupled with the Na<sup>+</sup> binding/release to/from c-subunit through the two half-channels of a-subunit. A recent single-molecule study observed similar small backward steps of 11° in *E. coli* F<sub>o</sub>F<sub>1</sub> during ATP-driven rotation and successfully revealed that backward steps are related to H<sup>+</sup> translocation between c-ring and half-channels of a-subunit (14). In the study of *E. coli* F<sub>o</sub>F<sub>1</sub>, small backward step was attributed to the fact that *E. coli* F<sub>o</sub>F<sub>1</sub> functions as ATP synthase. In the case of EhV<sub>o</sub>V<sub>1</sub>, because backward steps of 36° or larger than 36° rarely occurred, backward flow of Na<sup>+</sup> seems to be suppressed. The detailed mechanisms of the backward step may be different by ATP synthesis capacity, size of the c-ring, and ion species being transported. In the present study, however, the electrochemical potential of Na<sup>+</sup> could not be applied because detergent-solubilized EhV<sub>o</sub>V<sub>1</sub> was used. To address the question of whether the electrochemical potential of Na<sup>+</sup> can drive rotation of EhV<sub>o</sub>V<sub>1</sub> in opposite direction and ATP synthesis, our next targets are single-molecule imaging and biochemical assay of EhV<sub>o</sub>V<sub>1</sub> embedded in the lipid membrane.

## **Materials and Methods**

### *Sample preparation*

The construction of the expression plasmid for wild-type EhV<sub>o</sub>V<sub>1</sub> (pTR19-EhV<sub>o</sub>V<sub>1</sub>) was reported previously (16). For the plasmid construction of aE634A, EhV<sub>o</sub>V<sub>1</sub>(BR350K), and EhV<sub>1</sub>(BR350K), PCR-based site-directed mutagenesis was performed by KOD one PCR Master Mix (Toyobo) with pTR19-EhV<sub>o</sub>V<sub>1</sub> as a template. For expression and purification of wild-type, aE634A, EhV<sub>o</sub>V<sub>1</sub>(BR350K), and EhV<sub>1</sub>(BR350K), the procedures described in our previous study were used with some modifications (16, 44). Details are described in the SI Appendix.

### *Single-molecule imaging*

Gold nanoparticle (AuNP) with a diameter of 40 nm (EMGC40, BBI) was biotinylated with biotin-alkane-thiol (HS-C11-EG3, Surfmods) and coated by Streptavidin (PRO791, PROSPEC) as described in the previous reports (44, 79). We followed the setting of a total internal reflection dark-field microscope system based on a high-speed CMOS camera and an inverted microscope as described in our previous studies with some modifications (44). Details are described in the SI Appendix.

### *ICP-OES measurement*

To estimate the concentrations of contaminated  $\text{Na}^+$  in the observation buffers, we measured emission spectra using an inductivity coupled plasma optical emission spectrometer (ICP-OES; 5100 ICP-OES, Agilent Technologies). The emission signal at  $\lambda = 589.592$  nm was used for analysis. The flow rates of plasma and assist gas (Ar) were 14 and 1.2 L/min, respectively. The standard addition method was used to avoid physical and ionization interferences. Namely, sodium standard solution (FUJIFILM Wako) was added to the observation buffers in the range of 0.1 to 10 mg/L (4.3 to 430  $\mu\text{M}$ ) as a final concentration of  $\text{Na}^+$ . The calibration curve was extrapolated and the absolute value of the X-intercept was taken as the concentration of contaminated  $\text{Na}^+$ .

### **Acknowledgments**

We thank Monique Honsa for the advice about data analysis, Kazuyoshi Murata, Chihong Song, and Raymond N. Burton-Smith for providing us the structural data and their fruitful discussion, Yayoi Kon for her grateful technical support, and all laboratory members for helpful discussion and technical advice. This work was supported by the Grant-in-Aid for Scientific Research on Innovative Areas “Molecular Engine” (JP19H05380 to H.U., JP18H05425 to T.M., and JP18H05424 to R.I.), the Grants-in-Aid for Scientific Research (JP21H02454 to R.I., and JP21K15060 and JP20J01316 to A.O.) from the Ministry of Education, Culture, Sports, Science, and Technology of Japan, and by the NINS program for cross-disciplinary study (Grant Number 01312001 to A.O.). A part of this work was performed with the aid of Instrument Center of the Institute for Molecular Science.

## Figures and Tables

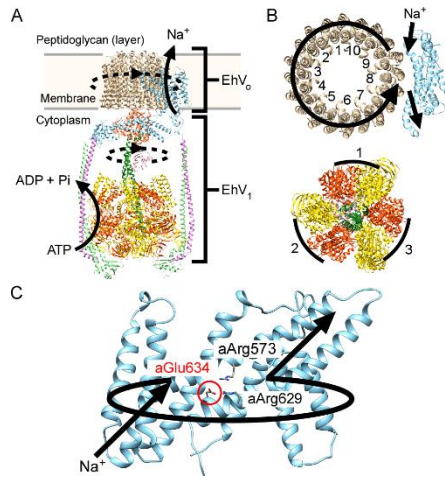

**Figure 1.** (A) Overall architecture of EhV<sub>o</sub>V<sub>1</sub>. The dotted circular arcs represent the rotation direction driven by ATP hydrolysis. (B) (top) Top view of a-subunit (cyan) and c<sub>10</sub>-ring (brown) of EhV<sub>o</sub> and (bottom) A- (yellow), B- (orange), D- (green), and F-subunits (pink) of EhV<sub>1</sub>. The black arrow at the top indicates the path of Na<sup>+</sup> movement during ATP-driven rotation. The arcs at the bottom represent the catalytic AB pairs. (C) Side view of a-subunit viewed from c-subunit. This structure was constructed by a SWISS-MODEL server (80) by using a structure of a-subunit of V-ATPase from *Thermus Thermophilus*. The black arrows represent the path of Na<sup>+</sup> movement during ATP-driven rotation. The mutated residue, aGlu634, is located on the surface of the entry half-channel of a-subunit as highlighted in red letters and a circle.



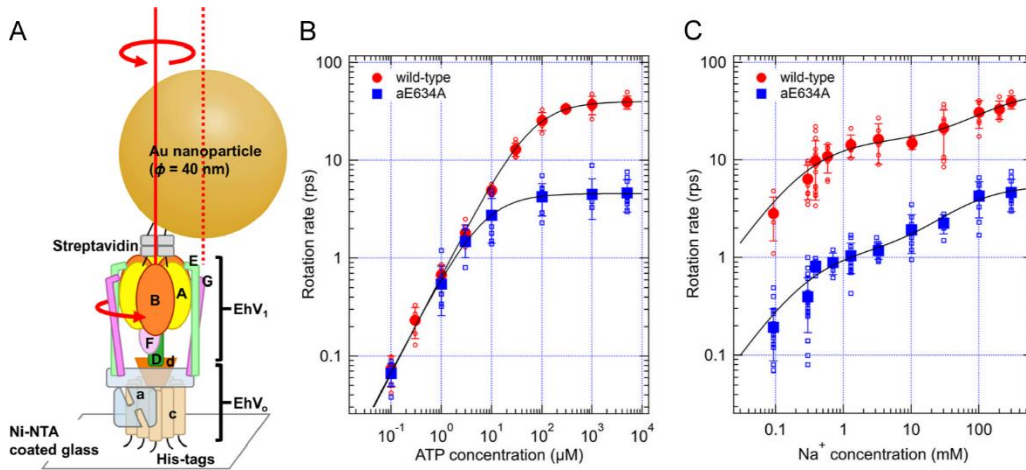

**Figure 2.** (A) Schematic model of single-molecule rotation assay of EhV<sub>0</sub>V<sub>1</sub> probed with AuNP. Each alphabet represents the name of subunits. EhV<sub>0</sub>V<sub>1</sub> was fixed on the Ni<sup>2+</sup>-NTA-coated cover glass via His<sub>3</sub>-tags added to the C-terminus of c-subunit. The streptavidin-coated gold nanoparticle (40 nm in diameter) was attached to the N-terminus of A-subunit which was biotinylated by adding Avi-tag. Solid and dotted red lines indicate the center axis of EhV<sub>0</sub>V<sub>1</sub> and the centroid of attached AuNP, respectively. Because the rotor c<sub>10</sub>-ring was fixed on a glass surface, the stator subunits rotate counterclockwise against rotor subunits as shown by red arrows. (B) [ATP] dependence of rotation rate of wild-type and aE634A at 300 mM NaCl. Red open and blue open squares indicate the data from individual molecules of wild-type and aE634A, respectively. The closed symbols are average, and error bar is the standard deviation. Data were fitted with Michaelis-Menten equation:  $V = V_{\max}^{\text{ATP}} \cdot [\text{ATP}] / (K_m^{\text{ATP}} + [\text{ATP}])$ . The obtained kinetic parameters are summarized in Table 1. (C) [Na<sup>+</sup>] dependence of rotation rate of wild-type and aE634A at 5 mM ATP. The correspondence of colored symbols is the same as in B. The black lines show the fit with sum of two-independent Michaelis-Menten equations:  $V = V_{\max 1}^{\text{Na}^+} \cdot [\text{Na}^+] / (K_{m1}^{\text{Na}^+} + [\text{Na}^+]) + V_{\max 2}^{\text{Na}^+} \cdot [\text{Na}^+] / (K_{m2}^{\text{Na}^+} + [\text{Na}^+])$ . The obtained kinetic parameters are summarized in Table 2. The contaminated Na<sup>+</sup> in the observation buffers were taken into account as shown in Figure S6. Namely, 50 mM Bis-Tris (pH6.5) was used for 0.09 mM Na<sup>+</sup>, and 20 mM potassium phosphate (pH6.5) was used for other [Na<sup>+</sup>]s as buffers.

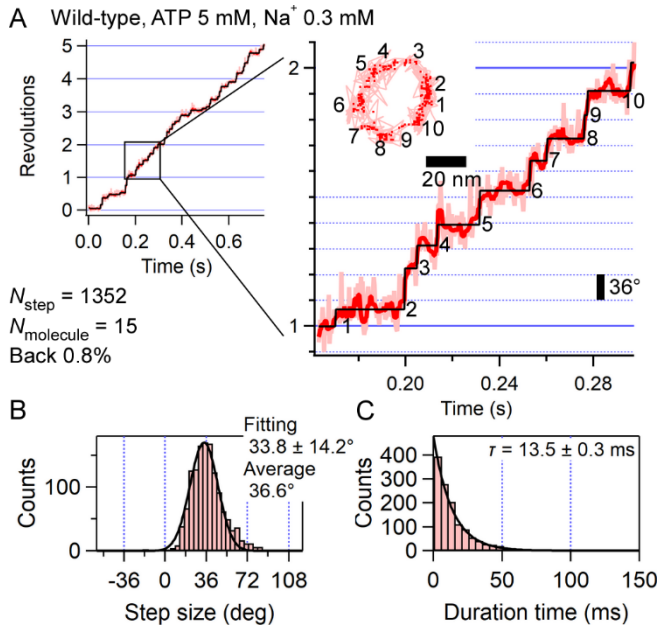

**Figure 3.** (A) Typical trajectory of ATP-driven rotation of wild-type EhV<sub>0</sub>V<sub>1</sub> at 5 mM ATP and 0.3 mM Na<sup>+</sup> recorded with 3,000 fps (0.33 ms time resolution). Enlarged view of one revolution (360°) is shown on the right. Pink, red, and black traces represent raw, median-filtered (current ± 4 frames), and fitted trajectories, respectively. Inset shows the corresponding x-y trajectory. Pink lines and red dots represent the raw and median-filtered (current ± 4 frames) coordinates, respectively. We collected 1352 steps from 15 molecules. Other examples of trajectory are shown in Figure S7. (B) Distribution of the step size fitted with single Gaussian assuming single peak. The right top values are fitted parameter (peak ± S.D.) and average. The ratio of backward steps was 0.8%. (C) Distribution of the duration time before forward step fitted with a single exponential decay function. The right top values are obtained time constant (fitted value ± S.E. of the fit).

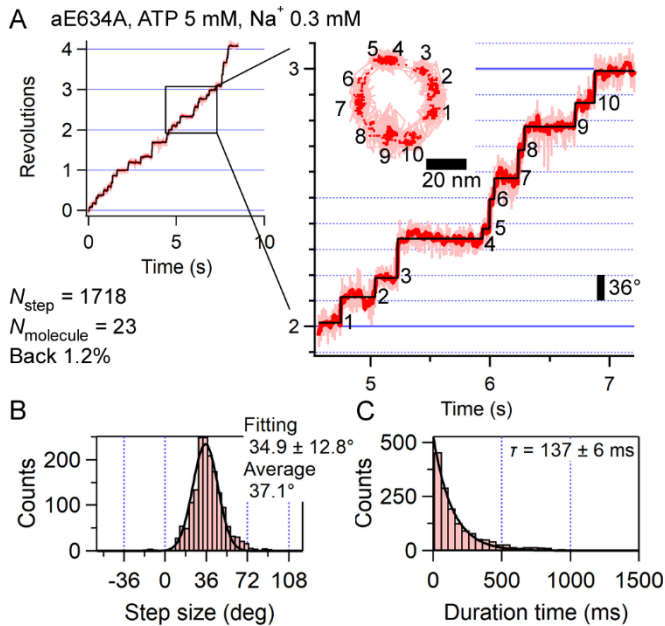

**Figure 4.** (A) Typical trajectory of ATP-driven rotation of aE634A at 5 mM ATP and 0.3 mM Na<sup>+</sup> recorded with 1,000 fps (1 ms time resolution). Enlarged view of one revolution (360°) is shown on the right. Pink, red, and black traces represent raw, median-filtered (current  $\pm 7$  frames), and fitted trajectories, respectively. Inset shows the corresponding x-y trajectory. Pink lines and red dots represent the raw and median-filtered (current  $\pm 7$  frames) coordinates, respectively. We collected 1718 steps from 23 molecules. Other examples of trajectory are shown in Figure S9. (B) Distribution of the step size fitted with single Gaussian assuming single peak. The right top values are fitted parameter (peak  $\pm$  S.D.) and average. The ratio of backward steps was 1.2%. (C) Distribution of the duration time before forward step fitted with a single exponential decay function. The right top values are obtained time constant (fitted value  $\pm$  S.E. of the fit).

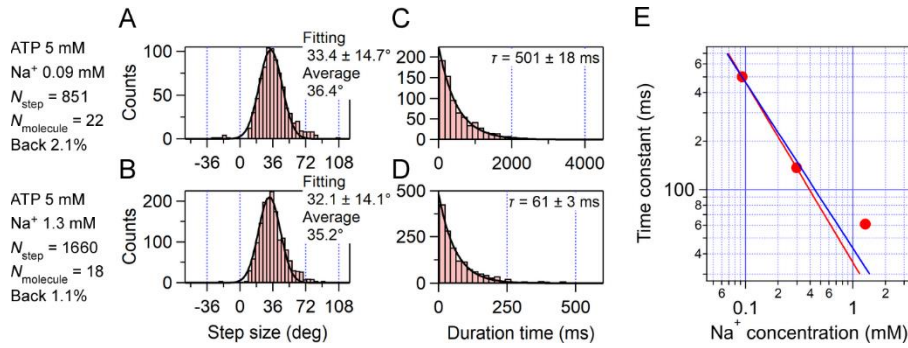

**Figure 5.** Single-molecule analysis of aE634A at saturated [ATP] (5 mM). Experimental conditions are described on the left of the figures. Examples of trajectory are shown in Figure S10. (A and B) Distribution of the step size at 0.09 and 1.3 mM Na<sup>+</sup>. Black lines represent fitting with single Gaussians. The right top values are fitted parameters (peak ± S.D.) and averages. (C and D) Distribution of the duration time before forward step. Black lines represent fitting with single exponential decay functions. The right top values are the obtained time constants (fitted value ± S.E. of the fit). (E) Plot between [Na<sup>+</sup>] (0.09, 0.3, and 1.3 mM) and time constant obtained by the fitting at 5 mM ATP. Solid red line represents a straight line connecting two data points at 0.09 and 0.3 mM Na<sup>+</sup>, and its slope is -1.1. Solid blue line is a result of linear fitting among all three data points. The obtained slope is -1.0.



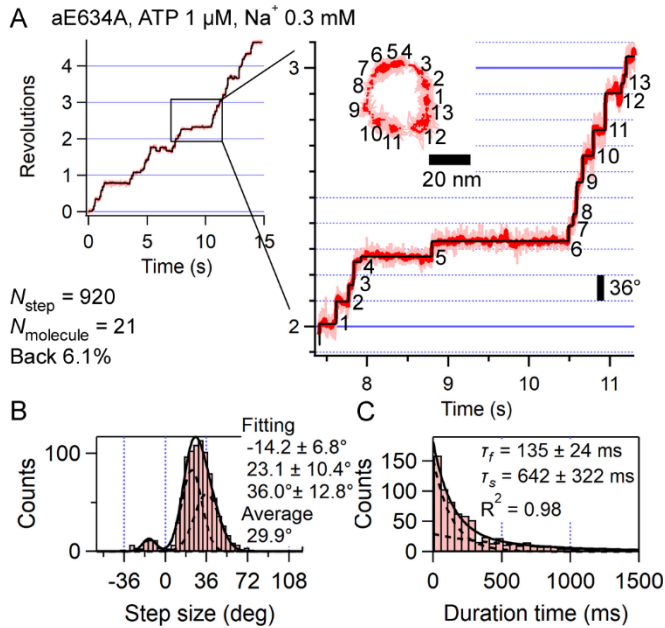

**Figure 6.** (A) Typical trajectory of ATP-driven rotation of aE634A at 1  $\mu$ M ATP and 0.3 mM Na<sup>+</sup> recorded with 1,000 fps (1 ms time resolution). Enlarged view of one revolution (360°) is shown on the right. Pink, red, and black traces represent raw, median-filtered (current  $\pm$  7 frames), and fitted trajectories, respectively. Inset shows the corresponding x-y trajectory. Pink lines and red dots represent the raw and median-filtered (current  $\pm$  7 frames) coordinates, respectively. We collected 920 steps from 21 molecules. Other examples of trajectory are shown in Figure S11. (B) Distribution of the step size fitted with a sum of three Gaussians: one peak in backward (minus) direction and two peaks in forward (plus) direction, one of which was fixed at 36°, assuming that it was the step of EhV<sub>o</sub>. The ratio of backward steps was 6.1%. (C) Distribution of the duration time before forward step fitted with a sum of two exponential decay functions. The right top values are obtained time constants (fitted value  $\pm$  S.E. of the fit) and the coefficient of determination ( $R^2$ ) of fitting.

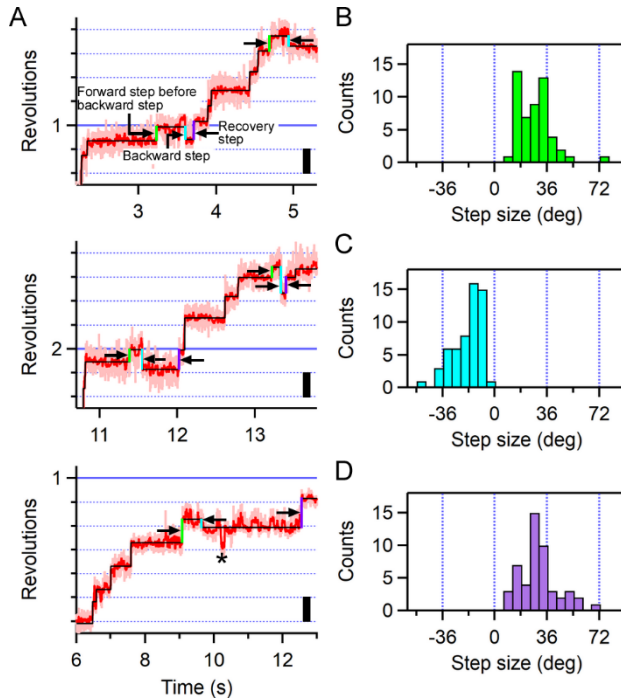

**Figure 7.** Backward steps of aE634A observed at  $1 \mu\text{M}$  ATP and  $0.3 \text{ mM}$   $\text{Na}^+$  with  $1,000 \text{ fps}$  ( $1 \text{ ms}$  time resolution). (A) Examples of trajectories showing the backward steps. The pink, red, and black traces represent the raw, median-filtered (current  $\pm 7$  frames), and fitted trajectories of the median-filtered data identified by the algorithm, respectively. The green, cyan, and purple lines indicate forward steps just before backward steps, backward steps, and forward steps just after backward steps (recovery steps), respectively. An asterisk indicates a backward step that is not detected as a step by the algorithm (under-fitting). (B to D) Distributions of step size for forward steps just before backward steps, backward steps, and recovery steps, respectively. In B and D, the distributions seemed to show two peaks at  $<36^\circ$  and  $36^\circ$ . In C, the peak position was larger than  $-36^\circ$  and the average value was  $-18.8^\circ$ .

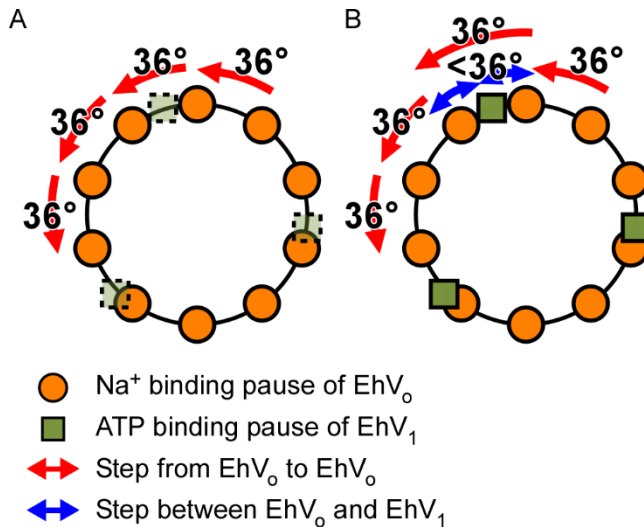

**Figure 8.** Schematic models of the stepping rotation and rigid coupling of  $EhV_0V_1$ . The orange circle and dark green square indicate the pausing positions waiting for  $Na^+$  binding to the  $EhV_0$  and ATP binding to the  $EhV_1$ , respectively. The red arrows indicate the  $36^\circ$  steps between adjacent pausing positions for the  $EhV_0$ . The blue arrows indicate the backward and forward steps smaller than  $36^\circ$  between adjacent pausing positions for the  $EhV_0$  and  $EhV_1$ . (A) The condition that only  $Na^+$  binding to the  $EhV_0$  is the rate-limiting factor. In this condition, the pauses waiting for ATP binding to the  $EhV_1$  are too short to be detected, and the  $EhV_0V_1$  rotates unidirectionally without backward steps. (B) The condition that both  $Na^+$  and ATP bindings are the rate-limiting factors. The pausing positions waiting for ATP binding are visualized and then 13-pausing positions are detected per single turn. Because no torque is generated during the pauses waiting for ATP binding to the  $EhV_1$ , the  $EhV_0V_1$  rotates to the backward and forward pausing positions of the  $EhV_0$  driven by the Brownian motion. As a result, backward and forward steps smaller than  $36^\circ$  are observed.

**Table 1.** Kinetic parameters for [ATP] dependence of rotation rate of EhV<sub>o</sub>V<sub>1</sub> and EhV<sub>1</sub>

| Protein                                   | NaCl (mM)     | $K_m^{ATP}$ ( $\mu$ M) | $V_{max}^{ATP}$ (rps) | $k_{on}^{ATP}$ <sup>a</sup> ( $M^{-1}s^{-1}$ ) | Reference                    |
|-------------------------------------------|---------------|------------------------|-----------------------|------------------------------------------------|------------------------------|
| EhV <sub>o</sub> V <sub>1</sub> wild-type | 300           | 60.4 ± 2.1             | 40.0 ± 0.3            | 2.0×10 <sup>6</sup>                            | This study (single-molecule) |
| EhV <sub>o</sub> V <sub>1</sub> aE634A    | 300           | 6.6 ± 0.3              | 4.58 ± 0.04           | 2.1×10 <sup>6</sup>                            | This study (single-molecule) |
| EhV <sub>o</sub> V <sub>1</sub> wild-type | 300           | 134 ± 12               | 59 ± 1                | 1.3×10 <sup>6</sup>                            | Ref. (16) (biochemical)      |
| EhV <sub>1</sub> wild-type                | 0 (50 mM KCl) | 43 ± 6                 | 117 ± 3               | 8.2×10 <sup>6</sup>                            | Ref. (44) (single-molecule)  |

<sup>a</sup> The binding rate constant of ATP estimated by  $k_{on}^{ATP} = 3 \times V_{max}^{ATP} / K_m^{ATP}$



**Table 2.** Kinetic parameters for [Na<sup>+</sup>] dependence of rotation rate of wild-type and aE634A <sup>a</sup>

| Protein                                      | $K_{m1}^{\text{Na}}$<br>(mM) | $V_{\text{max}1}^{\text{Na}}$<br>(rps) | $k_{\text{on}1}^{\text{Na} \text{ b}}$<br>(M <sup>-1</sup> s <sup>-1</sup> ) | $K_{m2}^{\text{Na}}$<br>(mM) | $V_{\text{max}2}^{\text{Na}}$<br>(rps) | $k_{\text{on}2}^{\text{Na} \text{ b}}$<br>(M <sup>-1</sup> s <sup>-1</sup> ) |
|----------------------------------------------|------------------------------|----------------------------------------|------------------------------------------------------------------------------|------------------------------|----------------------------------------|------------------------------------------------------------------------------|
| EhV <sub>o</sub> V <sub>1</sub><br>wild-type | 0.29 ± 0.09                  | 15.7 ± 1.6                             | 5.4 × 10 <sup>5</sup>                                                        | 160.2 ± 88.8                 | 35.0 ± 7.1                             | 2.2 × 10 <sup>3</sup>                                                        |
| EhV <sub>o</sub> V <sub>1</sub><br>aE634A    | 0.32 ± 0.28                  | 1.1 ± 0.3                              | 3.4 × 10 <sup>4</sup>                                                        | 58.3 ± 26.5                  | 4.4 ± 0.5                              | 7.5 × 10 <sup>2</sup>                                                        |

<sup>a</sup> [ATP] was 5 mM

<sup>b</sup> The binding rate constant of Na<sup>+</sup> estimated by  $k_{\text{on}1(2)}^{\text{Na}} = 10 \times V_{\text{max}1(2)}^{\text{Na}} / K_{m1(2)}^{\text{Na}}$

## References

1. R. Yasuda, H. Noji, M. Yoshida, K. Kinosita, H. Itoh, Resolution of distinct rotational substeps by submillisecond kinetic analysis of F<sub>1</sub>-ATPase. *Nature* **410**, 898-904 (2001).
2. M. Forgacs, Vacuolar ATPases: rotary proton pumps in physiology and pathophysiology. *Nature Reviews Molecular Cell Biology* **8**, 917-929 (2007).
3. John E. Walker, The ATP synthase: the understood, the uncertain and the unknown. *Biochem. Soc. Trans.* **41**, 1-16 (2013).
4. P. D. Boyer, THE ATP SYNTHASE—A SPLENDID MOLECULAR MACHINE. *Annu. Rev. Biochem.* **66**, 717-749 (1997).
5. T. Vasanthakumar, J. L. Rubinstein, Structure and Roles of V-type ATPases. *Trends Biochem. Sci.* **45**, 295-307 (2020).
6. A. G. Stewart, M. Sobti, R. P. Harvey, D. Stock, Rotary ATPases. *BioArchitecture* **3**, 2-12 (2013).
7. G. Grüber, M. S. S. Manimekalai, F. Mayer, V. Müller, ATP synthases from archaea: The beauty of a molecular motor. *Biochim. Biophys. Acta* **1837**, 940-952 (2014).
8. H. Sielaff *et al.*, Domain compliance and elastic power transmission in rotary F<sub>o</sub>F<sub>1</sub>-ATPase. *Proc. Natl. Acad. Sci. U. S. A.* **105**, 17760-17765 (2008).
9. H. Sielaff, H. Rennekamp, S. Engelbrecht, W. Junge, Functional Halt Positions of Rotary F<sub>o</sub>F<sub>1</sub>-ATPase Correlated with Crystal Structures. *Biophys. J.* **95**, 4979-4987 (2008).
10. R. Yasuda, H. Noji, K. Kinosita, M. Yoshida, F<sub>1</sub>-ATPase Is a Highly Efficient Molecular Motor that Rotates with Discrete 120° Steps. *Cell* **93**, 1117-1124 (1998).
11. H. Noji, R. Yasuda, M. Yoshida, K. Kinosita, Direct observation of the rotation of F<sub>1</sub>-ATPase. *Nature* **386**, 299-302 (1997).
12. R. Ishmukhametov, T. Hornung, D. Spetzler, W. D. Frasch, Direct observation of stepped proteolipid ring rotation in *E. coli* F<sub>o</sub>F<sub>1</sub>-ATP synthase. *The EMBO Journal* **29**, 3911-3923 (2010).
13. S. Yanagisawa, W. D. Frasch, Protonation-dependent stepped rotation of the F-type ATP synthase c-ring observed by single-molecule measurements. *J. Biol. Chem.* **292**, 17093-17100 (2017).
14. S. Yanagisawa, W. D. Frasch, pH-dependent 11° F<sub>1</sub>F<sub>o</sub> ATP synthase sub-steps reveal insight into the F<sub>o</sub> torque generating mechanism. *eLife* **10** (2021).
15. H. Sielaff, S. Yanagisawa, W. D. Frasch, W. Junge, M. Börsch, Structural Asymmetry and Kinetic Limping of Single Rotary F-ATP Synthases. *Molecules* **24**, 504 (2019).
16. H. Ueno *et al.*, Torque Generation of *Enterococcus hirae* V-ATPase. *J. Biol. Chem.* **289**, 31212-31223 (2014).
17. J. Martin, J. Hudson, T. Hornung, W. D. Frasch, F<sub>o</sub>-driven Rotation in the ATP Synthase Direction against the Force of F<sub>1</sub> ATPase in the F<sub>o</sub>F<sub>1</sub> ATP Synthase. *J. Biol. Chem.* **290**, 10717-10728 (2015).
18. J. L. Martin, R. Ishmukhametov, T. Hornung, Z. Ahmad, W. D. Frasch, Anatomy of F<sub>1</sub>-ATPase powered rotation. *Proc. Natl. Acad. Sci. U. S. A.* **111**, 3715 (2014).
19. S. Furuie *et al.*, Resolving stepping rotation in *Thermus thermophilus* H<sup>+</sup>-ATPase/synthase with an essentially drag-free probe. *Nature Communications* **2**, 233 (2011).
20. W. C. Y. Lau, J. L. Rubinstein, Structure of intact *Thermus thermophilus* V-ATPase by cryo-EM reveals organization of the membrane-bound V<sub>o</sub> motor. *Proc. Natl. Acad. Sci. U. S. A.* **107**, 1367 (2010).
21. M. G. Düser *et al.*, 36° step size of proton-driven c-ring rotation in F<sub>o</sub>F<sub>1</sub>-ATP synthase. *The EMBO Journal* **28**, 2689-2696 (2009).
22. B. Zimmermann, M. Diez, N. Zarrabi, P. Gräber, M. Börsch, Movements of the ε-subunit during catalysis and activation in single membrane-bound H<sup>+</sup>-ATP synthase. *The EMBO Journal* **24**, 2053-2063 (2005).
23. L. Zhou, L. A. Sazanov, Structure and conformational plasticity of the intact *Thermus thermophilus* V/A-type ATPase. *Science* **365**, eaaw9144 (2019).

24. M. Sobti *et al.*, Cryo-EM structures provide insight into how *E. coli* F<sub>1</sub>F<sub>o</sub> ATP synthase accommodates symmetry mismatch. *Nature Communications* **11**, 2615 (2020).
25. J. Tsunoda *et al.*, Off-axis rotor in *Enterococcus hirae* V-ATPase visualized by Zernike phase plate single-particle cryo-electron microscopy. *Scientific Reports* **8**, 15632 (2018).
26. M. M. Khan *et al.*, Oxidative stress protein Oxr1 promotes V-ATPase holoenzyme disassembly in catalytic activity - independent manner. *The EMBO Journal* **41** (2022).
27. J. Kishikawa *et al.*, Structural snapshots of V/A-ATPase reveal the rotary catalytic mechanism of rotary ATPases. *Nature Communications* **13** (2022).
28. H. Guo, T. Suzuki, J. L. Rubinstein, Structure of a bacterial ATP synthase. *eLife* **8** (2019).
29. A. Zhou *et al.*, Structure and conformational states of the bovine mitochondrial ATP synthase by cryo-EM. *eLife* **4** (2015).
30. S.-H. Roh *et al.*, The 3.5-Å CryoEM Structure of Nanodisc-Reconstituted Yeast Vacuolar ATPase V<sub>o</sub> Proton Channel. *Mol. Cell* **69**, 993-1004.e1003 (2018).
31. S.-H. Roh *et al.*, Cryo-EM and MD infer water-mediated proton transport and autoinhibition mechanisms of V<sub>o</sub> complex. *Science Advances* **6**, eabb9605 (2020).
32. Y. M. Abbas, D. Wu, S. A. Bueler, C. V. Robinson, J. L. Rubinstein, Structure of V-ATPase from the mammalian brain. *Science* **367**, 1240-1246 (2020).
33. B. J. Murphy *et al.*, Rotary substates of mitochondrial ATP synthase reveal the basis of flexible F<sub>1</sub>-F<sub>o</sub> coupling. *Science* **364**, eaaw9128 (2019).
34. H. Guo, J. L. Rubinstein, Structure of ATP synthase under strain during catalysis. *Nature Communications* **13** (2022).
35. D. L. Heefner, F. M. Harold, ATP-driven sodium pump in *Streptococcus faecalis*. *Proc. Natl. Acad. Sci. U. S. A.* **79**, 2798-2802 (1982).
36. M. Ikegami, H. Takahashi, K. Igarashi, Y. Kakinuma, Sodium ATPase and Sodium/proton Antiporter Are Not Obligatory for Sodium Homeostasis of *Enterococcus hirae* at Acid pH. *Biosci., Biotechnol., Biochem.* **64**, 1088-1092 (2000).
37. Y. Kakinuma, I. Yamato, T. Murata, Structure and Function of Vacuolar Na<sup>+</sup>-Translocating ATPase in *Enterococcus hirae*. *J. Bioenerg. Biomembr.* **31**, 7-14 (1999).
38. Y. Kakinuma, K. Igarashi, Electrogenic Na<sup>+</sup> transport by *Enterococcus hirae* Na<sup>+</sup>-ATPase. *FEBS Lett.* **359**, 255-258 (1995).
39. Y. Kakinuma, K. Igarashi, Amplification of the Na<sup>+</sup>-ATPase of *Streptococcus faecalis* at alkaline pH. *FEBS Lett.* **261**, 135-138 (1990).
40. S. Arai *et al.*, Rotation mechanism of *Enterococcus hirae* V<sub>1</sub>-ATPase based on asymmetric crystal structures. *Nature* **493**, 703-707 (2013).
41. K. Suzuki *et al.*, Crystal structures of the ATP-binding and ADP-release dwells of the V<sub>1</sub> rotary motor. *Nature Communications* **7**, 13235 (2016).
42. T. Murata *et al.*, Ion binding and selectivity of the rotor ring of the Na<sup>+</sup>-transporting V-ATPase. *Proc. Natl. Acad. Sci. U. S. A.* **105**, 8607 (2008).
43. H. Imamura *et al.*, Evidence for rotation of V<sub>1</sub>-ATPase. *Proc. Natl. Acad. Sci. U. S. A.* **100**, 2312 (2003).
44. T. Iida *et al.*, Single-molecule analysis reveals rotational substeps and chemo-mechanical coupling scheme of *Enterococcus hirae* V<sub>1</sub>-ATPase. *J. Biol. Chem.* **294**, 17017-17030 (2019).
45. Y. Minagawa *et al.*, Basic Properties of Rotary Dynamics of the Molecular Motor *Enterococcus hirae* V<sub>1</sub>-ATPase. *J. Biol. Chem.* **288**, 32700-32707 (2013).
46. M. Allegretti *et al.*, Horizontal membrane-intrinsic  $\alpha$ -helices in the stator *a*-subunit of an F-type ATP synthase. *Nature* **521**, 237-240 (2015).
47. A. Hahn, J. Vonck, D. J. Mills, T. Meier, W. Kühlbrandt, Structure, mechanism, and regulation of the chloroplast ATP synthase. *Science* **360**, eaat4318 (2018).
48. C. M. Angevine, K. A. G. Herold, O. D. Vincent, R. H. Fillingame, Aqueous Access Pathways in ATP Synthase Subunit *a*: REACTIVITY OF CYSTEINE SUBSTITUTED INTO TRANSMEMBRANE HELICES 1, 3, AND 5. *J. Biol. Chem.* **282**, 9001-9007 (2007).
49. W. Junge, ATP synthase and other motor proteins. *Proc. Natl. Acad. Sci. U. S. A.* **96**, 4735 (1999).

50. S. B. Vik, B. J. Antonio, A mechanism of proton translocation by  $F_1F_0$  ATP synthases suggested by double mutants of the  $a$  subunit. *J. Biol. Chem.* **269**, 30364-30369 (1994).
51. W. Junge, H. Lill, S. Engelbrecht, ATP synthase: an electrochemical ransducer with rotatory mechanics. *Trends Biochem. Sci.* **22**, 420-423 (1997).
52. C. von Ballmoos, P. Dimroth, Two Distinct Proton Binding Sites in the ATP Synthase Family. *Biochemistry* **46**, 11800-11809 (2007).
53. T. Murata, I. Yamato, Y. Kakinuma, A. G. W. Leslie, J. E. Walker, Structure of the Rotor of the V-Type  $Na^+$ -ATPase from *Enterococcus hirae*. *Science* **308**, 654 (2005).
54. C. Bai, A. Warshel, Revisiting the protomotive vectorial motion of  $F_0$ -ATPase. *Proc. Natl. Acad. Sci. U. S. A.* **116**, 19484-19489 (2019).
55. D. Matthies *et al.*, High-resolution structure and mechanism of an F/V-hybrid rotor ring in a  $Na^+$ -coupled ATP synthase. *Nature Communications* **5**, 5286 (2014).
56. H. Noji, H. Ueno, R. Kobayashi, Correlation between the numbers of rotation steps in the ATPase and proton-conducting domains of F- and V-ATPases. *Biophysical Reviews* **12**, 303-307 (2020).
57. A. Cheuk, T. Meier, Rotor subunits adaptations in ATP synthases from photosynthetic organisms. *Biochem. Soc. Trans.* **49**, 541-550 (2021).
58. W. Junge, H. Sielaff, S. Engelbrecht, Torque generation and elastic power transmission in the rotary  $F_0F_1$ -ATPase. *Nature* **459**, 364-370 (2009).
59. D. Beckett, E. Kovaleva, P. J. Schatz, A minimal peptide substrate in biotin holoenzyme synthetase-catalyzed biotinylation. *Protein Sci.* **8**, 921-929 (1999).
60. T. Vasanthakumar *et al.*, Structural comparison of the vacuolar and Golgi V-ATPases from *Saccharomyces cerevisiae*. *Proc. Natl. Acad. Sci. U. S. A.* **116**, 7272 (2019).
61. T. Murata, K. Takase, I. Yamato, K. Igarashi, Y. Kakinuma, Properties of the  $V_0V_1$   $Na^+$ -ATPase from *Enterococcus hirae* and Its  $V_0$  Moiety. *The Journal of Biochemistry* **125**, 414-421 (1999).
62. J. W. J. Kerssemakers *et al.*, Assembly dynamics of microtubules at molecular resolution. *Nature* **442**, 709-712 (2006).
63. J. Ando *et al.*, Small stepping motion of processive dynein revealed by load-free high-speed single-particle tracking. *Scientific Reports* **10** (2020).
64. A. Nakamura, K.-I. Okazaki, T. Furuta, M. Sakurai, R. Iino, Processive chitinase is Brownian monorail operated by fast catalysis after peeling rail from crystalline chitin. *Nature Communications* **9** (2018).
65. E. Spikes Tobias, G. Montgomery Martin, E. Walker John, Structure of the dimeric ATP synthase from bovine mitochondria. *Proc. Natl. Acad. Sci. U. S. A.* **117**, 23519-23526 (2020).
66. K. Nishio, A. Iwamoto-Kihara, A. Yamamoto, Y. Wada, M. Futai, Subunit rotation of ATP synthase embedded in membranes:  $\alpha$  or  $\beta$  subunit rotation relative to the  $c$  subunit ring. *Proc. Natl. Acad. Sci. U. S. A.* **99**, 13448 (2002).
67. H. Ueno, T. Suzuki, K. Kinosita, M. Yoshida, ATP-driven stepwise rotation of  $F_0F_1$ -ATP synthase. *Proc. Natl. Acad. Sci. U. S. A.* **102**, 1333 (2005).
68. K. Yokoyama, M. Nakano, H. Imamura, M. Yoshida, M. Tamakoshi, Rotation of the Proteolipid Ring in the V-ATPase. *J. Biol. Chem.* **278**, 24255-24258 (2003).
69. T. Hirata *et al.*, Subunit Rotation of Vacuolar-type Proton Pumping ATPase: RELATIVE ROTATION OF THE  $G$  AND  $c$  SUBUNITS. *J. Biol. Chem.* **278**, 23714-23719 (2003).
70. D. G. Schep, J. Zhao, J. L. Rubinstein, Models for the  $a$  subunits of the Thermus thermophilus V/A-ATPase and *Saccharomyces cerevisiae* V-ATPase enzymes by cryo-EM and evolutionary covariance. *Proc. Natl. Acad. Sci. U. S. A.* **113**, 3245-3250 (2016).
71. V. Leone, D. Pogoryelov, T. Meier, J. D. Faraldo-Gómez, On the principle of ion selectivity in  $Na^+/H^+$ -coupled membrane proteins: Experimental and theoretical studies of an ATP synthase rotor. *Proc. Natl. Acad. Sci. U. S. A.* **112**, E1057-E1066 (2015).
72. K. Schlegel, V. Leone, J. D. Faraldo-Gómez, V. Muller, Promiscuous archaeal ATP synthase concurrently coupled to  $Na^+$  and  $H^+$  translocation. *Proc. Natl. Acad. Sci. U. S. A.* **109**, 947-952 (2012).

73. T. Murata, K. Takase, I. Yamato, K. Igarashi, Y. Kakinuma, The *ntpJ* Gene in the *Enterococcus hirae ntp* Operon Encodes a Component of KtrII Potassium Transport System Functionally Independent of Vacuolar Na<sup>+</sup>-ATPase. *J. Biol. Chem.* **271**, 10042-10047 (1996).
74. R. Watanabe *et al.*, Biased Brownian stepping rotation of F<sub>o</sub>F<sub>1</sub>-ATP synthase driven by proton motive force. *Nature Communications* **4**, 1631 (2013).
75. W. Jiang, J. Hermolin, R. H. Fillingame, The preferred stoichiometry of *c* subunits in the rotary motor sector of *Escherichia coli* ATP synthase is 10. *Proc. Natl. Acad. Sci. U. S. A.* **98**, 4966 (2001).
76. A. Wachter *et al.*, Two rotary motors in F-ATP synthase are elastically coupled by a flexible rotor and a stiff stator stalk. *Proc. Natl. Acad. Sci. U. S. A.* **108**, 3924-3929 (2011).
77. L. Colina-Tenorio, A. Dautant, H. Miranda-Astudillo, M.-F. Giraud, D. González-Halphen, The Peripheral Stalk of Rotary ATPases. *Frontiers in Physiology* **9** (2018).
78. J. E. Walker, V. K. Dickson, The peripheral stalk of the mitochondrial ATP synthase. *Biochim. Biophys. Acta* **1757**, 286-296 (2006).
79. J. Ando *et al.*, Single-Nanoparticle Tracking with Angstrom Localization Precision and Microsecond Time Resolution. *Biophys. J.* **115**, 2413-2427 (2018).
80. A. Waterhouse *et al.*, SWISS-MODEL: homology modelling of protein structures and complexes. *Nucleic Acids Res.* **46**, W296-W303 (2018).
